# Supplementary material
Source: publisher site journal article supplement (http://www.kjim.org/upload/media/kjim-2023-393-Supplementary-File-2.pdf)
Supplement: Supplementary file 1 [file kjim-2023-393-Supplementary-File-2.pdf]

**Supplementary File 2. List of excluded studies after full-text screening**

| No | Excluded studies                                                                                                                                                                                                                                                                                 | Reason for exclusion                                |
|----|--------------------------------------------------------------------------------------------------------------------------------------------------------------------------------------------------------------------------------------------------------------------------------------------------|-----------------------------------------------------|
| 1  | MacLeod, Mairi, et al. Chronic obstructive pulmonary disease exacerbation fundamentals: diagnosis, treatment, prevention, and disease impact. <i>Respirology</i> . 2021; 26(6): 532-551.                                                                                                         | No content about particulate matter                 |
| 2  | Long, Erin, and Christopher Carlsten. Controlled human exposure to diesel exhaust: results illuminate health effects of traffic-related air pollution and inform future directions. <i>Particle and Fibre Toxicology</i> 2022;19(1): 1-35.                                                       | No content about the exacerbation of airway disease |
| 3  | Johns Hopkins University. Motivational Interviewing and Air Cleaners for Smokers with COPD (MOVE COPD). 15 Sep 2018 to 31 May 2024. Clinical trials. Gov.                                                                                                                                        | Abstract only                                       |
| 4  | Ryu, M. H., et al. The Thromboxane A2 Pathway, as Assessed by Urinary Eicosanoids, Is Increased After Acute Controlled Exposure to Diesel Exhaust in Participants with COPD. In: B105. MORE CALLS TO ACTION: AIR POLLUTION EXPOSURES AND HEALTH. American Thoracic Society;2022. p. A3579-A3579. | Abstract only                                       |
